# Supplementary material for: Reduced WNT4 expression in normal skin fibroblasts leads to ‘Dupuytren-like’ changes in the transcriptome
Source: PubMed Central journal article supplement (PMC11458971; doi:10.1016/j.heliyon.2024.e38016), 2024-09-17
Supplement: mmc1.pdf [file mmc1.pdf]

Supp Table 1 DD vs DDC comparison

| ENSG     | baseMean | log2FoldC | lfcSE    | stat     | pvalue   | padj     | symbol    | entrez | genename                                                  |
|----------|----------|-----------|----------|----------|----------|----------|-----------|--------|-----------------------------------------------------------|
| ENSG0000 | 1445.535 | 7.527035  | 0.527443 | 14.2708  | 3.33E-46 | 6.80E-42 | SCRG1     | 11341  | stimulator of chondrogenesis 1                            |
| ENSG0000 | 30165.09 | 7.060163  | 0.529774 | 13.32674 | 1.62E-40 | 1.65E-36 | CHI3L1    | 1116   | chitinase 3 like 1                                        |
| ENSG0000 | 329.011  | 4.880292  | 0.380099 | 12.83953 | 9.85E-38 | 6.71E-34 | ITGB2     | 3689   | integrin subunit beta 2                                   |
| ENSG0000 | 146899.2 | 1.678717  | 0.138994 | 12.07762 | 1.39E-33 | 7.08E-30 | COL12A1   | 1303   | collagen type XII alpha 1 chain                           |
| ENSG0000 | 237.9376 | 2.653065  | 0.221998 | 11.95086 | 6.43E-33 | 2.63E-29 | NA        | NA     | NA                                                        |
| ENSG0000 | 315.4139 | -8.80776  | 0.776658 | -11.3406 | 8.26E-30 | 2.81E-26 | CHRM2     | 1129   | cholinergic receptor muscarinic 2                         |
| ENSG0000 | 940.4362 | 4.495589  | 0.40742  | 11.03429 | 2.61E-28 | 7.62E-25 | DAPK1     | 1612   | death associated protein kinase 1                         |
| ENSG0000 | 45420.22 | 2.560806  | 0.235585 | 10.86999 | 1.60E-27 | 4.09E-24 | ITGA11    | 22801  | integrin subunit alpha 11                                 |
| ENSG0000 | 1111.258 | 3.482956  | 0.32315  | 10.77814 | 4.37E-27 | 9.91E-24 | MEDAG     | 84935  | mesenteric estrogen dependent adipogenesis                |
| ENSG0000 | 409.9789 | 8.270147  | 0.776764 | 10.64693 | 1.80E-26 | 3.68E-23 | KRT16     | 3868   | keratin 16                                                |
| ENSG0000 | 2295.721 | -2.91763  | 0.274444 | -10.6311 | 2.14E-26 | 3.94E-23 | NES       | 10763  | nestin                                                    |
| ENSG0000 | 202.962  | -7.71313  | 0.726035 | -10.6236 | 2.31E-26 | 3.94E-23 | IRX2      | 153572 | iroquois homeobox 2                                       |
| ENSG0000 | 107937.4 | 3.397741  | 0.320114 | 10.61416 | 2.56E-26 | 4.02E-23 | CEMIP     | 57214  | cell migration inducing hyaluronidase 1                   |
| ENSG0000 | 112.4467 | -7.06601  | 0.670978 | -10.5309 | 6.22E-26 | 9.08E-23 | NA        | NA     | NA                                                        |
| ENSG0000 | 1125.164 | 7.932971  | 0.75491  | 10.50849 | 7.89E-26 | 1.08E-22 | CSF2RB    | 1439   | colony stimulating factor 2 receptor subunit beta         |
| ENSG0000 | 172.8414 | 5.137919  | 0.493279 | 10.41586 | 2.10E-25 | 2.68E-22 | CHRDL1    | 91851  | chordin like 1                                            |
| ENSG0000 | 13183.96 | 2.505823  | 0.241496 | 10.37626 | 3.18E-25 | 3.82E-22 | MFAP5     | 8076   | microfibril associated protein 5                          |
| ENSG0000 | 328.1161 | -9.04362  | 0.872142 | -10.3694 | 3.42E-25 | 3.88E-22 | LHX8      | 431707 | LIM homeobox 8                                            |
| ENSG0000 | 13704.49 | 5.124799  | 0.496341 | 10.32515 | 5.42E-25 | 5.83E-22 | ABI3BP    | 25890  | ABI family member 3 binding protein                       |
| ENSG0000 | 2505.719 | 4.274287  | 0.430347 | 9.93219  | 3.02E-23 | 3.08E-20 | CILP2     | 148113 | cartilage intermediate layer protein 2                    |
| ENSG0000 | 524.8223 | 7.181062  | 0.736171 | 9.754611 | 1.76E-22 | 1.64E-19 | PRG4      | 10216  | proteoglycan 4                                            |
| ENSG0000 | 543.3207 | 5.631632  | 0.584584 | 9.633569 | 5.77E-22 | 5.12E-19 | PNMA2     | 10687  | PNMA family member 2                                      |
| ENSG0000 | 241.7267 | 2.972251  | 0.316612 | 9.387674 | 6.13E-21 | 5.22E-18 | CGREF1    | 10669  | cell growth regulator with EF-hand domain 1               |
| ENSG0000 | 475.4362 | 2.348225  | 0.252826 | 9.287925 | 1.57E-20 | 1.29E-17 | CSGALNAC  | 55790  | chondroitin sulfate N-acetylgalactosaminyltransferase 1   |
| ENSG0000 | 448.6361 | 6.431914  | 0.698437 | 9.209005 | 3.29E-20 | 2.59E-17 | MEOX2     | 4223   | mesenchyme homeobox 2                                     |
| ENSG0000 | 4428.194 | -4.96976  | 0.541405 | -9.17937 | 4.34E-20 | 3.28E-17 | MMP1      | 4312   | matrix metalloproteinase 1                                |
| ENSG0000 | 911.8341 | 2.231888  | 0.243611 | 9.161669 | 5.11E-20 | 3.73E-17 | JAG1      | 182    | jagged canonical Notch ligand 1                           |
| ENSG0000 | 218.2144 | -7.94676  | 0.867985 | -9.15541 | 5.42E-20 | 3.81E-17 | SPHKAP    | 80309  | SPHK1 interactor, AKAP domain containing                  |
| ENSG0000 | 1099.783 | 5.057988  | 0.561707 | 9.004675 | 2.16E-19 | 1.47E-16 | PAPPA2    | 60676  | pappalysin 2                                              |
| ENSG0000 | 5360.999 | 4.775755  | 0.530903 | 8.995539 | 2.35E-19 | 1.55E-16 | VCAM1     | 7412   | vascular cell adhesion molecule 1                         |
| ENSG0000 | 529.9509 | 2.15476   | 0.241353 | 8.927823 | 4.34E-19 | 2.77E-16 | NA        | NA     | NA                                                        |
| ENSG0000 | 120.0513 | -10.0693  | 1.131351 | -8.90028 | 5.57E-19 | 3.45E-16 | SHOX      | 6473   | short stature homeobox                                    |
| ENSG0000 | 2243.905 | -6.39659  | 0.726202 | -8.80828 | 1.27E-18 | 7.64E-16 | SFRP1     | 6422   | secreted frizzled related protein 1                       |
| ENSG0000 | 128.7655 | -4.17071  | 0.486586 | -8.57138 | 1.02E-17 | 5.97E-15 | CES1      | 1066   | carboxylesterase 1                                        |
| ENSG0000 | 2228.168 | -1.69864  | 0.198357 | -8.56357 | 1.09E-17 | 6.21E-15 | SCD       | 6319   | stearoyl-CoA desaturase                                   |
| ENSG0000 | 329.7563 | 5.667848  | 0.666194 | 8.507798 | 1.77E-17 | 9.53E-15 | SCN3A     | 6328   | sodium voltage-gated channel alpha subunit 3              |
| ENSG0000 | 251.7749 | 4.292915  | 0.510053 | 8.416607 | 3.88E-17 | 1.98E-14 | SIX2      | 10736  | SIX homeobox 2                                            |
| ENSG0000 | 292.9428 | -1.72861  | 0.205737 | -8.40201 | 4.39E-17 | 2.19E-14 | CNIH3     | 149111 | cornichon family AMPA receptor auxiliary protein 3        |
| ENSG0000 | 391.6661 | 4.461005  | 0.533867 | 8.356022 | 6.49E-17 | 3.16E-14 | PLXDC2    | 84898  | plexin domain containing 2                                |
| ENSG0000 | 1734.51  | 4.227235  | 0.50697  | 8.338228 | 7.54E-17 | 3.58E-14 | PDE1C     | 5137   | phosphodiesterase 1C                                      |
| ENSG0000 | 107.7029 | 4.014682  | 0.488419 | 8.219742 | 2.04E-16 | 9.06E-14 | PPM1H     | 57460  | protein phosphatase, Mg2+/Mn2+ dependent 1H               |
| ENSG0000 | 970.2533 | 6.248413  | 0.763943 | 8.179163 | 2.86E-16 | 1.24E-13 | SORBS2    | 8470   | sorbin and SH3 domain containing 2                        |
| ENSG0000 | 332.147  | 8.507426  | 1.042724 | 8.158849 | 3.38E-16 | 1.44E-13 | EPGN      | 255324 | epithelial mitogen                                        |
| ENSG0000 | 254.5113 | -3.68856  | 0.45621  | -8.08522 | 6.21E-16 | 2.59E-13 | RNF112    | 7732   | ring finger protein 112                                   |
| ENSG0000 | 40816.3  | 2.596123  | 0.322439 | 8.051504 | 8.18E-16 | 3.34E-13 | PTX3      | 5806   | pentraxin 3                                               |
| ENSG0000 | 410.6385 | 1.689942  | 0.211433 | 7.992804 | 1.32E-15 | 5.28E-13 | PTK2B     | 2185   | protein tyrosine kinase 2 beta                            |
| ENSG0000 | 202.7744 | 3.981305  | 0.498796 | 7.981826 | 1.44E-15 | 5.66E-13 | NA        | NA     | NA                                                        |
| ENSG0000 | 35323.77 | 4.245916  | 0.532984 | 7.966316 | 1.63E-15 | 6.30E-13 | EFEMP1    | 2202   | EGF containing fibulin extracellular matrix protein 1     |
| ENSG0000 | 30558.26 | 1.613225  | 0.203607 | 7.923228 | 2.31E-15 | 8.76E-13 | MFGE8     | 4240   | milk fat globule EGF and factor V/VIII domain containing  |
| ENSG0000 | 251.0476 | 3.000053  | 0.379657 | 7.902018 | 2.74E-15 | 1.02E-12 | ANKRD6    | 22881  | ankyrin repeat domain 6                                   |
| ENSG0000 | 5880.101 | 2.058177  | 0.262184 | 7.85011  | 4.16E-15 | 1.52E-12 | MEGF6     | 1953   | multiple EGF like domains 6                               |
| ENSG0000 | 147.398  | 2.932299  | 0.376369 | 7.791022 | 6.65E-15 | 2.38E-12 | HAS3      | 3038   | hyaluronan synthase 3                                     |
| ENSG0000 | 3576.68  | -5.95101  | 0.76767  | -7.75204 | 9.04E-15 | 3.19E-12 | FBN2      | 2201   | fibrillin 2                                               |
| ENSG0000 | 372.0362 | 2.229155  | 0.288623 | 7.723427 | 1.13E-14 | 3.92E-12 | CARD10    | 29775  | caspase recruitment domain family member 10               |
| ENSG0000 | 218.5395 | -2.27844  | 0.295447 | -7.71185 | 1.24E-14 | 4.22E-12 | RNF152    | 220441 | ring finger protein 152                                   |
| ENSG0000 | 99.2046  | -2.96535  | 0.388848 | -7.62597 | 2.42E-14 | 7.98E-12 | TRABD2A   | 129293 | TraB domain containing 2A                                 |
| ENSG0000 | 1471.349 | 1.825311  | 0.239657 | 7.616342 | 2.61E-14 | 8.46E-12 | ADAMTS7   | 11173  | ADAM metalloproteinase with thrombospondin type 1 motif 7 |
| ENSG0000 | 637.7454 | -1.51773  | 0.199393 | -7.61172 | 2.70E-14 | 8.63E-12 | HS3ST3A1  | 9955   | heparan sulfate-glucosamine 3-sulfotransferase 3A1        |
| ENSG0000 | 2448.528 | -2.55743  | 0.336399 | -7.60237 | 2.91E-14 | 9.14E-12 | COL7A1    | 1294   | collagen type VII alpha 1 chain                           |
| ENSG0000 | 776.0383 | 1.827134  | 0.241055 | 7.579731 | 3.46E-14 | 1.07E-11 | FZD4      | 8322   | frizzled class receptor 4                                 |
| ENSG0000 | 412.1192 | 2.120792  | 0.282339 | 7.511518 | 5.84E-14 | 1.76E-11 | DCLK1     | 9201   | doublecortin like kinase 1                                |
| ENSG0000 | 15293.91 | 2.116071  | 0.283098 | 7.474702 | 7.74E-14 | 2.29E-11 | IGFBP5    | 3488   | insulin like growth factor binding protein 5              |
| ENSG0000 | 57.10524 | -5.80131  | 0.780605 | -7.43182 | 1.07E-13 | 3.13E-11 | COL23A1   | 91522  | collagen type XXIII alpha 1 chain                         |
| ENSG0000 | 7247.117 | 2.431929  | 0.327976 | 7.41495  | 1.22E-13 | 3.50E-11 | CYP1B1    | 1545   | cytochrome P450 family 1 subfamily B member 1             |
| ENSG0000 | 95.04179 | -4.34854  | 0.58803  | -7.3951  | 1.41E-13 | 4.01E-11 | FLRT3     | 23767  | fibronectin leucine rich transmembrane protein 3          |
| ENSG0000 | 154.8379 | 4.101987  | 0.55528  | 7.387247 | 1.50E-13 | 4.19E-11 | CACNB4    | 785    | calcium voltage-gated channel auxiliary subunit beta 4    |
| ENSG0000 | 42.26215 | 5.813064  | 0.796783 | 7.295672 | 2.97E-13 | 8.14E-11 | PKNOX2    | 63876  | PBX/knotted 1 homeobox 2                                  |
| ENSG0000 | 143.2805 | 1.666585  | 0.228458 | 7.294929 | 2.99E-13 | 8.14E-11 | ADAMTS7   | 400406 | ADAMTS7 pseudogene 3                                      |
| ENSG0000 | 212.8903 | 3.406992  | 0.467811 | 7.28284  | 3.27E-13 | 8.79E-11 | CSTA      | 1475   | cystatin A                                                |
| ENSG0000 | 1081.757 | 2.104898  | 0.290045 | 7.257132 | 3.95E-13 | 1.05E-10 | CCPG1     | 9236   | cell cycle progression 1                                  |
| ENSG0000 | 916.0438 | -2.68217  | 0.370334 | -7.24257 | 4.40E-13 | 1.15E-10 | SLC9A3R2  | 9351   | SLC9A3 regulator 2                                        |
| ENSG0000 | 613.3747 | 4.465192  | 0.616919 | 7.237887 | 4.56E-13 | 1.18E-10 | SRGN      | 5552   | serglycin                                                 |
| ENSG0000 | 61.99605 | 3.04116   | 0.421401 | 7.216787 | 5.32E-13 | 1.36E-10 | CYP1B1-AS | 285154 | CYP1B1 antisense RNA 1                                    |
| ENSG0000 | 52.18038 | -8.15146  | 1.13466  | -7.18406 | 6.77E-13 | 1.71E-10 | NA        | NA     | NA                                                        |
| ENSG0000 | 1318.327 | 2.571951  | 0.358751 | 7.169188 | 7.54E-13 | 1.88E-10 | HAPLN3    | 145864 | hyaluronan and proteoglycan link protein 3                |
| ENSG0000 | 421.2785 | 4.27063   | 0.602808 | 7.084561 | 1.39E-12 | 3.43E-10 | NTRK2     | 4915   | neurotrophic receptor tyrosine kinase 2                   |

|          |          |          |          |          |          |          |           |          |                                                                |
|----------|----------|----------|----------|----------|----------|----------|-----------|----------|----------------------------------------------------------------|
| ENSG0000 | 127.4728 | 6.736148 | 0.952468 | 7.072306 | 1.52E-12 | 3.71E-10 | EYA4      | 2070     | EYA transcriptional coactivator and phosphatase 4              |
| ENSG0000 | 65.06579 | -2.79659 | 0.395638 | -7.06856 | 1.57E-12 | 3.76E-10 | FERMT3    | 83706    | FERM domain containing kindlin 3                               |
| ENSG0000 | 163.3783 | 2.918004 | 0.415328 | 7.025775 | 2.13E-12 | 5.02E-10 | ZNF704    | 619279   | zinc finger protein 704                                        |
| ENSG0000 | 441.8176 | 4.122703 | 0.586843 | 7.025221 | 2.14E-12 | 5.02E-10 | TPD52L1   | 7164     | TPD52 like 1                                                   |
| ENSG0000 | 933.3015 | -3.11406 | 0.443867 | -7.01574 | 2.29E-12 | 5.31E-10 | CHN1      | 1123     | chimerin 1                                                     |
| ENSG0000 | 181.0131 | 6.849562 | 0.978066 | 7.00317  | 2.50E-12 | 5.74E-10 | EPHA5     | 2044     | EPH receptor A5                                                |
| ENSG0000 | 928.0519 | -4.18191 | 0.603386 | -6.93074 | 4.19E-12 | 9.50E-10 | PTN       | 5764     | pleiotrophin                                                   |
| ENSG0000 | 29.03387 | -4.13981 | 0.601042 | -6.88772 | 5.67E-12 | 1.27E-09 | RIMS2     | 9699     | regulating synaptic membrane exocytosis 2                      |
| ENSG0000 | 660.9701 | 4.328983 | 0.628731 | 6.885268 | 5.77E-12 | 1.28E-09 | DEPTOR    | 64798    | DEP domain containing MTOR interacting protein                 |
| ENSG0000 | 187.9547 | 1.60085  | 0.234747 | 6.819471 | 9.14E-12 | 1.99E-09 | LINC01547 | 84536    | long intergenic non-protein coding RNA 1547                    |
| ENSG0000 | 42.83207 | -3.72522 | 0.548456 | -6.79219 | 1.10E-11 | 2.37E-09 | CARD16    | 114769   | caspase recruitment domain family member 16                    |
| ENSG0000 | 3319.275 | -3.47838 | 0.514104 | -6.7659  | 1.32E-11 | 2.82E-09 | TBX3      | 6926     | T-box transcription factor 3                                   |
| ENSG0000 | 41.14699 | -4.39775 | 0.651672 | -6.7484  | 1.49E-11 | 3.15E-09 | TRIM55    | 84675    | tripartite motif containing 55                                 |
| ENSG0000 | 7271.508 | 2.679351 | 0.397402 | 6.742162 | 1.56E-11 | 3.25E-09 | IGFBP7    | 3490     | insulin like growth factor binding protein 7                   |
| ENSG0000 | 25776.1  | 1.725021 | 0.257955 | 6.687282 | 2.27E-11 | 4.69E-09 | TXNRD1    | 7296     | thioredoxin reductase 1                                        |
| ENSG0000 | 52.20727 | -5.411   | 0.809477 | -6.68457 | 2.32E-11 | 4.73E-09 | CES1P1    | 51716    | carboxylesterase 1 pseudogene 1                                |
| ENSG0000 | 332.0405 | 3.476621 | 0.520615 | 6.677918 | 2.42E-11 | 4.90E-09 | SAMD12    | 401474   | sterile alpha motif domain containing 12                       |
| ENSG0000 | 6245.306 | 1.736451 | 0.26027  | 6.671717 | 2.53E-11 | 5.06E-09 | C1orf198  | 84886    | chromosome 1 open reading frame 198                            |
| ENSG0000 | 1041.364 | 8.379112 | 1.268201 | 6.607084 | 3.92E-11 | 7.76E-09 | KRT14     | 3861     | keratin 14                                                     |
| ENSG0000 | 1256.825 | 3.332784 | 0.504519 | 6.605859 | 3.95E-11 | 7.76E-09 | MAF       | 4094     | MAF bZIP transcription factor                                  |
| ENSG0000 | 41.1757  | 8.027776 | 1.220513 | 6.57738  | 4.79E-11 | 9.32E-09 | IL26      | 55801    | interleukin 26                                                 |
| ENSG0000 | 1080.699 | 1.700739 | 0.259303 | 6.558894 | 5.42E-11 | 1.04E-08 | ADM2      | 79924    | adrenomedullin 2                                               |
| ENSG0000 | 73.02492 | 3.169573 | 0.484766 | 6.538357 | 6.22E-11 | 1.19E-08 | HTR2A     | 3356     | 5-hydroxytryptamine receptor 2A                                |
| ENSG0000 | 593.969  | -2.03176 | 0.310807 | -6.53705 | 6.27E-11 | 1.19E-08 | SKAP2     | 8935     | src kinase associated phosphoprotein 2                         |
| ENSG0000 | 272.7314 | -2.83737 | 0.434905 | -6.52412 | 6.84E-11 | 1.28E-08 | PRKAR2B   | 5577     | protein kinase cAMP-dependent type II regulatory sub unit beta |
| ENSG0000 | 145.8785 | -2.86107 | 0.440084 | -6.50119 | 7.97E-11 | 1.48E-08 | SEMA6D    | 80031    | semaphorin 6D                                                  |
| ENSG0000 | 873.9143 | -3.56973 | 0.549445 | -6.49696 | 8.20E-11 | 1.51E-08 | TNFRSF21  | 27242    | TNF receptor superfamily member 21                             |
| ENSG0000 | 10160.56 | 2.215229 | 0.342544 | 6.466986 | 1.00E-10 | 1.82E-08 | CDH13     | 1012     | cadherin 13                                                    |
| ENSG0000 | 1974.601 | -8.32407 | 1.291773 | -6.44391 | 1.16E-10 | 2.09E-08 | APCDD1    | 147495   | APC down-regulated 1                                           |
| ENSG0000 | 66.09372 | -5.93499 | 0.921385 | -6.44138 | 1.18E-10 | 2.10E-08 | GAL       | 51083    | galanin and GMAP prepropeptide                                 |
| ENSG0000 | 424.1536 | 2.544207 | 0.395246 | 6.437024 | 1.22E-10 | 2.15E-08 | LINC01133 | 1.01E+08 | long intergenic non-protein coding RNA 1133                    |
| ENSG0000 | 58.6884  | 5.559077 | 0.86499  | 6.426754 | 1.30E-10 | 2.28E-08 | KRT31     | 3881     | keratin 31                                                     |
| ENSG0000 | 273.6245 | 3.376971 | 0.526741 | 6.411065 | 1.45E-10 | 2.50E-08 | DMD       | 1756     | dystrophin                                                     |
| ENSG0000 | 1152.495 | -2.15135 | 0.335791 | -6.4068  | 1.49E-10 | 2.55E-08 | TBX5-AS1  | 255480   | TBX5 antisense RNA 1                                           |
| ENSG0000 | 35.49623 | -3.30352 | 0.518775 | -6.36793 | 1.92E-10 | 3.26E-08 | LTK       | 4058     | leukocyte receptor tyrosine kinase                             |
| ENSG0000 | 801.6303 | 2.856495 | 0.451641 | 6.324698 | 2.54E-10 | 4.21E-08 | DEPP1     | 11067    | DEPP1 autophagy regulator                                      |
| ENSG0000 | 39.26634 | 7.307678 | 1.157831 | 6.311522 | 2.76E-10 | 4.55E-08 | PART1     | 25859    | prostate androgen-regulated transcript 1                       |
| ENSG0000 | 170.0363 | 4.560258 | 0.723847 | 6.300028 | 2.98E-10 | 4.82E-08 | STEAP4    | 79689    | STEAP4 metalloredutase                                         |
| ENSG0000 | 790.125  | -2.85002 | 0.455085 | -6.26261 | 3.79E-10 | 6.06E-08 | GALNT6    | 11226    | polypeptide N-acetylgalactosaminyltransferase 6                |
| ENSG0000 | 39.36002 | 3.834232 | 0.612288 | 6.262141 | 3.80E-10 | 6.06E-08 | CDH1      | 999      | cadherin 1                                                     |
| ENSG0000 | 36.69955 | 4.887848 | 0.783276 | 6.240265 | 4.37E-10 | 6.92E-08 | NA        | NA       | NA                                                             |
| ENSG0000 | 2152.671 | 1.954225 | 0.31389  | 6.22583  | 4.79E-10 | 7.53E-08 | COL11A1   | 1301     | collagen type XI alpha 1 chain                                 |
| ENSG0000 | 307.1557 | 4.11362  | 0.661069 | 6.222676 | 4.89E-10 | 7.62E-08 | H19       | 283120   | H19 imprinted maternally expressed transcript                  |
| ENSG0000 | 277.7374 | -3.4415  | 0.553475 | -6.21799 | 5.04E-10 | 7.79E-08 | DIRAS3    | 9077     | DIRAS family GTPase 3                                          |
| ENSG0000 | 33.72545 | -7.57511 | 1.220713 | -6.20548 | 5.45E-10 | 8.38E-08 | NA        | NA       | NA                                                             |
| ENSG0000 | 85.41302 | -8.20448 | 1.323459 | -6.19927 | 5.67E-10 | 8.65E-08 | IRX1      | 79192    | iroquois homeobox 1                                            |
| ENSG0000 | 57.598   | -6.5998  | 1.065747 | -6.19265 | 5.92E-10 | 8.95E-08 | SOX11     | 6664     | SRY-box transcription factor 11                                |
| ENSG0000 | 38.61588 | 4.405136 | 0.712412 | 6.183409 | 6.27E-10 | 9.42E-08 | GPR88     | 54112    | G protein-coupled receptor 88                                  |
| ENSG0000 | 604.1987 | 5.591058 | 0.904585 | 6.180797 | 6.38E-10 | 9.51E-08 | CCKAR     | 886      | cholecystokinin A receptor                                     |
| ENSG0000 | 59.64424 | -3.72909 | 0.604819 | -6.16564 | 7.02E-10 | 1.04E-07 | HOXA5     | 3202     | homeobox A5                                                    |
| ENSG0000 | 177.8521 | 3.19618  | 0.524481 | 6.09399  | 1.10E-09 | 1.61E-07 | NALCN     | 259232   | sodium leak channel, non-selective                             |
| ENSG0000 | 96.87807 | 4.744715 | 0.780386 | 6.079956 | 1.20E-09 | 1.74E-07 | SCARA5    | 286133   | scavenger receptor class A member 5                            |
| ENSG0000 | 327.9095 | -1.78535 | 0.293988 | -6.07285 | 1.26E-09 | 1.81E-07 | STXBP6    | 29091    | syntaxin binding protein 6                                     |
| ENSG0000 | 128.2124 | 5.258488 | 0.869067 | 6.050731 | 1.44E-09 | 2.06E-07 | SLC16A9   | 220963   | solute carrier family 16 member 9                              |
| ENSG0000 | 56.92481 | 6.713645 | 1.110212 | 6.047171 | 1.47E-09 | 2.09E-07 | KRT16P3   | 644945   | keratin 16 pseudogene 3                                        |
| ENSG0000 | 161.884  | 2.543268 | 0.421799 | 6.029574 | 1.64E-09 | 2.28E-07 | CYP19A1   | 1588     | cytochrome P450 family 19 subfamily A member 1                 |
| ENSG0000 | 191.9901 | 4.094366 | 0.679389 | 6.026545 | 1.68E-09 | 2.31E-07 | KCTD16    | 57528    | potassium channel tetramerization domain containing 16         |
| ENSG0000 | 72.03205 | -7.33273 | 1.217059 | -6.02496 | 1.69E-09 | 2.32E-07 | NA        | NA       | NA                                                             |
| ENSG0000 | 2215.245 | 3.77613  | 0.627197 | 6.020642 | 1.74E-09 | 2.37E-07 | NTN4      | 59277    | netrin 4                                                       |
| ENSG0000 | 3843.9   | 8.636338 | 1.441841 | 5.989799 | 2.10E-09 | 2.82E-07 | SFRP4     | 6424     | secreted frizzled related protein 4                            |
| ENSG0000 | 222.0382 | -1.87193 | 0.312583 | -5.98858 | 2.12E-09 | 2.82E-07 | MBNL3     | 55796    | muscleblind like splicing regulator 3                          |
| ENSG0000 | 31.73182 | 3.433544 | 0.573415 | 5.987893 | 2.13E-09 | 2.82E-07 | TP63      | 8626     | tumor protein p63                                              |
| ENSG0000 | 112.0544 | 5.986293 | 1.000081 | 5.98581  | 2.15E-09 | 2.84E-07 | KRT33B    | 3884     | keratin 33B                                                    |
| ENSG0000 | 304.2949 | -5.34262 | 0.892761 | -5.98438 | 2.17E-09 | 2.84E-07 | TRMT9B    | 57604    | tRNA methyltransferase 9B (putative)                           |
| ENSG0000 | 165.4752 | 1.663684 | 0.278104 | 5.98223  | 2.20E-09 | 2.86E-07 | GSAP      | 54103    | gamma-secretase activating protein                             |
| ENSG0000 | 36.67157 | 3.088749 | 0.516465 | 5.980554 | 2.22E-09 | 2.86E-07 | LINC02015 | 1.03E+08 | long intergenic non-protein coding RNA 2015                    |
| ENSG0000 | 94.32653 | 2.058512 | 0.344207 | 5.98045  | 2.23E-09 | 2.86E-07 | LGALS1    | 29094    | galectin like                                                  |
| ENSG0000 | 50.97731 | 6.202453 | 1.037499 | 5.978271 | 2.26E-09 | 2.88E-07 | CHRD12    | 25884    | chordin like 2                                                 |
| ENSG0000 | 23.40712 | 6.844448 | 1.149223 | 5.955718 | 2.59E-09 | 3.27E-07 | NA        | NA       | NA                                                             |
| ENSG0000 | 84.73215 | 6.969881 | 1.170844 | 5.952868 | 2.63E-09 | 3.30E-07 | CDH18     | 1016     | cadherin 18                                                    |
| ENSG0000 | 21210.38 | 1.83594  | 0.308951 | 5.942492 | 2.81E-09 | 3.50E-07 | ADAMTS1   | 9510     | ADAM metalloproteinase with thrombospondin type 1 motif 1      |
| ENSG0000 | 19.44536 | -4.0583  | 0.686763 | -5.90932 | 3.44E-09 | 4.23E-07 | NA        | NA       | NA                                                             |
| ENSG0000 | 1441.356 | 2.832187 | 0.480915 | 5.889161 | 3.88E-09 | 4.73E-07 | FNDC1     | 84624    | fibronectin type III domain containing 1                       |
| ENSG0000 | 39.64837 | 3.92049  | 0.665759 | 5.888751 | 3.89E-09 | 4.73E-07 | NA        | NA       | NA                                                             |
| ENSG0000 | 1891.802 | 2.915523 | 0.495962 | 5.878522 | 4.14E-09 | 5.00E-07 | GFRA1     | 2674     | GDNF family receptor alpha 1                                   |
| ENSG0000 | 136.0545 | 2.716025 | 0.462339 | 5.874531 | 4.24E-09 | 5.07E-07 | SLC2A5    | 6518     | solute carrier family 2 member 5                               |
| ENSG0000 | 30.48444 | -5.35075 | 0.914884 | -5.84856 | 4.96E-09 | 5.89E-07 | NA        | NA       | NA                                                             |

|          |          |          |          |          |          |          |           |          |                                                               |
|----------|----------|----------|----------|----------|----------|----------|-----------|----------|---------------------------------------------------------------|
| ENSG0000 | 76.70697 | 6.033985 | 1.033843 | 5.836464 | 5.33E-09 | 6.30E-07 | LINC01018 | 255167   | long intergenic non-protein coding RNA 1018                   |
| ENSG0000 | 21.52505 | -5.29856 | 0.909122 | -5.82821 | 5.60E-09 | 6.58E-07 | P2RY1     | 5028     | purinergic receptor P2Y1                                      |
| ENSG0000 | 23.67829 | 4.232144 | 0.728993 | 5.80547  | 6.42E-09 | 7.45E-07 | LINC01750 | 643355   | long intergenic non-protein coding RNA 1750                   |
| ENSG0000 | 74.72837 | 5.809238 | 1.000969 | 5.803617 | 6.49E-09 | 7.49E-07 | HRH2      | 3274     | histamine receptor H2                                         |
| ENSG0000 | 81.27146 | 1.64718  | 0.284184 | 5.796176 | 6.78E-09 | 7.79E-07 | ZFH4-AS1  | 1E+08    | ZFH4 antisense RNA 1                                          |
| ENSG0000 | 111.8538 | 3.267732 | 0.564669 | 5.786987 | 7.17E-09 | 8.09E-07 | CCND2     | 894      | cyclin D2                                                     |
| ENSG0000 | 1695.706 | 1.699391 | 0.2939   | 5.782204 | 7.37E-09 | 8.28E-07 | ARL4C     | 10123    | ADP ribosylation factor like GTPase 4C                        |
| ENSG0000 | 304.8865 | 2.267932 | 0.393704 | 5.760506 | 8.39E-09 | 9.36E-07 | FUCA1     | 2517     | alpha-L-fucosidase 1                                          |
| ENSG0000 | 150.8549 | 3.178299 | 0.552601 | 5.751531 | 8.84E-09 | 9.82E-07 | PCSK1     | 5122     | proprotein convertase subtilisin/kexin type 1                 |
| ENSG0000 | 102.9551 | -5.81356 | 1.013757 | -5.73467 | 9.77E-09 | 1.07E-06 | ANO4      | 121601   | anoctamin 4                                                   |
| ENSG0000 | 60.32538 | 4.159232 | 0.725916 | 5.729632 | 1.01E-08 | 1.09E-06 | KLHDC7B   | 113730   | kelch domain containing 7B                                    |
| ENSG0000 | 29.73085 | 4.011383 | 0.700457 | 5.726808 | 1.02E-08 | 1.11E-06 | IGF1      | 3479     | insulin like growth factor 1                                  |
| ENSG0000 | 17155.13 | 1.524845 | 0.267212 | 5.706498 | 1.15E-08 | 1.24E-06 | GJA1      | 2697     | gap junction protein alpha 1                                  |
| ENSG0000 | 31.80065 | 4.103646 | 0.720936 | 5.69211  | 1.25E-08 | 1.34E-06 | CCDC110   | 256309   | coiled-coil domain containing 110                             |
| ENSG0000 | 250.866  | -2.94038 | 0.516937 | -5.68809 | 1.28E-08 | 1.37E-06 | TOX2      | 84969    | TOX high mobility group box family member 2                   |
| ENSG0000 | 140.5113 | 2.422745 | 0.426056 | 5.686444 | 1.30E-08 | 1.37E-06 | HMG2-AS1  | 1E+08    | HMG2 antisense RNA 1                                          |
| ENSG0000 | 390.8244 | -3.76617 | 0.663618 | -5.67521 | 1.39E-08 | 1.44E-06 | CASP1     | 834      | caspase 1                                                     |
| ENSG0000 | 47.14542 | 2.116269 | 0.373065 | 5.672656 | 1.41E-08 | 1.46E-06 | ADAMTS7   | 390660   | ADAMTS7 pseudogene 1                                          |
| ENSG0000 | 57.29886 | 4.757984 | 0.8393   | 5.66899  | 1.44E-08 | 1.47E-06 | PADI2     | 11240    | peptidyl arginine deiminase 2                                 |
| ENSG0000 | 179.5165 | 3.525234 | 0.622214 | 5.665631 | 1.46E-08 | 1.50E-06 | NA        | NA       | NA                                                            |
| ENSG0000 | 291.2887 | 2.585143 | 0.457076 | 5.655823 | 1.55E-08 | 1.57E-06 | ASPHD2    | 57168    | aspartate beta-hydroxylase domain containing 2                |
| ENSG0000 | 46.7031  | -4.05582 | 0.71747  | -5.65295 | 1.58E-08 | 1.59E-06 | APBA2     | 321      | amyloid beta precursor protein binding family A member 2      |
| ENSG0000 | 70.09104 | 3.120444 | 0.552852 | 5.644269 | 1.66E-08 | 1.66E-06 | KRTAP1-1  | 81851    | keratin associated protein 1-1                                |
| ENSG0000 | 26.35013 | -4.03713 | 0.717489 | -5.62674 | 1.84E-08 | 1.82E-06 | ST8SIA5   | 29906    | ST8 alpha-N-acetylneuraminidase alpha-2,8-sialyltransferase 5 |
| ENSG0000 | 3294.453 | 2.110241 | 0.375997 | 5.612383 | 2.00E-08 | 1.97E-06 | GRAMD2B   | 65983    | GRAM domain containing 2B                                     |
| ENSG0000 | 869.8808 | -2.39121 | 0.427285 | -5.59629 | 2.19E-08 | 2.15E-06 | GNG2      | 54331    | G protein subunit gamma 2                                     |
| ENSG0000 | 43.69225 | 3.677452 | 0.657618 | 5.592081 | 2.24E-08 | 2.18E-06 | GALNT13   | 114805   | polypeptide N-acetylgalactosaminyltransferase 13              |
| ENSG0000 | 116.7767 | 1.549452 | 0.277638 | 5.580831 | 2.39E-08 | 2.32E-06 | RFLNA     | 144347   | refilin A                                                     |
| ENSG0000 | 79.52821 | 2.601715 | 0.466309 | 5.579374 | 2.41E-08 | 2.33E-06 | VLDLR-AS1 | 401491   | VLDLR antisense RNA 1                                         |
| ENSG0000 | 898.338  | 1.646423 | 0.295195 | 5.577416 | 2.44E-08 | 2.34E-06 | COBL1     | 22837    | cordon-bleu WH2 repeat protein like 1                         |
| ENSG0000 | 368.8601 | 3.246669 | 0.582535 | 5.573343 | 2.50E-08 | 2.39E-06 | GATA6     | 2627     | GATA binding protein 6                                        |
| ENSG0000 | 39.42904 | -4.90894 | 0.8813   | -5.57011 | 2.55E-08 | 2.42E-06 | HOXA1     | 3198     | homeobox A1                                                   |
| ENSG0000 | 62.39832 | -3.84566 | 0.69335  | -5.5465  | 2.91E-08 | 2.74E-06 | WNT7B     | 7477     | Wnt family member 7B                                          |
| ENSG0000 | 27.00907 | 4.223776 | 0.76167  | 5.545413 | 2.93E-08 | 2.75E-06 | APOA1     | 335      | apolipoprotein A1                                             |
| ENSG0000 | 664.2147 | 2.679144 | 0.483915 | 5.5364   | 3.09E-08 | 2.88E-06 | GDF5      | 8200     | growth differentiation factor 5                               |
| ENSG0000 | 50.98487 | 5.890146 | 1.06466  | 5.532419 | 3.16E-08 | 2.93E-06 | TMEM178   | 1.01E+08 | transmembrane protein 178B                                    |
| ENSG0000 | 2156.026 | 2.47648  | 0.448355 | 5.523484 | 3.32E-08 | 3.07E-06 | LACC1     | 144811   | laccase domain containing 1                                   |
| ENSG0000 | 319.7704 | 2.089107 | 0.378679 | 5.516826 | 3.45E-08 | 3.16E-06 | NHSL1     | 57224    | NHS like 1                                                    |
| ENSG0000 | 1388.445 | -1.70441 | 0.308975 | -5.51633 | 3.46E-08 | 3.16E-06 | GNG11     | 2791     | G protein subunit gamma 11                                    |
| ENSG0000 | 1839.989 | 3.561075 | 0.649254 | 5.484876 | 4.14E-08 | 3.73E-06 | MEST      | 4232     | mesoderm specific transcript                                  |
| ENSG0000 | 448.0038 | 2.06584  | 0.378145 | 5.463091 | 4.68E-08 | 4.17E-06 | NA        | NA       | NA                                                            |
| ENSG0000 | 8364.688 | 8.644128 | 1.585059 | 5.453505 | 4.94E-08 | 4.39E-06 | ACAN      | 176      | aggrecan                                                      |
| ENSG0000 | 18012.64 | -3.88667 | 0.714611 | -5.43886 | 5.36E-08 | 4.74E-06 | MXRA5     | 25878    | matrix remodeling associated 5                                |
| ENSG0000 | 264.9256 | -8.69776 | 1.602947 | -5.4261  | 5.76E-08 | 5.03E-06 | GRIK2     | 2898     | glutamate ionotropic receptor kainate type subunit 2          |
| ENSG0000 | 160.828  | -4.53594 | 0.837032 | -5.41907 | 5.99E-08 | 5.21E-06 | COL6A6    | 131873   | collagen type VI alpha 6 chain                                |
| ENSG0000 | 184.5698 | -5.25206 | 0.972234 | -5.40205 | 6.59E-08 | 5.67E-06 | MAP2K6    | 5608     | mitogen-activated protein kinase kinase 6                     |

Supp Table 2 DDC vs NS comparison

| ENSG     | baseMean | log2FoldC | lfcSE    | stat     | pvalue    | padj      | symbol   | entrez   | genename                                                         |
|----------|----------|-----------|----------|----------|-----------|-----------|----------|----------|------------------------------------------------------------------|
| ENSG0000 | 1751.458 | -3.99209  | 0.182657 | -21.8557 | 6.86E-106 | 1.80E-101 | JAM2     | 58494    | junctional adhesion molecule 2                                   |
| ENSG0000 | 8139.154 | -2.95224  | 0.178747 | -16.5163 | 2.80E-61  | 3.68E-57  | JUND     | 3727     | JunD proto-oncogene, AP-1 transcription factor subunit           |
| ENSG0000 | 4536.474 | -3.8835   | 0.237745 | -16.3347 | 5.59E-60  | 4.89E-56  | CSRP1    | 64651    | cysteine and serine rich nuclear protein 1                       |
| ENSG0000 | 391.7914 | -4.68084  | 0.288902 | -16.2021 | 4.87E-59  | 3.20E-55  | TNFSF9   | 8744     | TNF superfamily member 9                                         |
| ENSG0000 | 13622.91 | -4.41895  | 0.29259  | -15.1029 | 1.55E-51  | 8.14E-48  | GADD45B  | 4616     | growth arrest and DNA damage inducible beta                      |
| ENSG0000 | 424.3872 | 2.005845  | 0.133761 | 14.99568 | 7.84E-51  | 3.43E-47  | MRTFB    | 57496    | myocardin related transcription factor B                         |
| ENSG0000 | 393.3528 | -5.98573  | 0.399742 | -14.974  | 1.09E-50  | 4.08E-47  | HES4     | 57801    | hes family bHLH transcription factor 4                           |
| ENSG0000 | 13590.97 | -5.35951  | 0.369699 | -14.497  | 1.27E-47  | 3.70E-44  | BHLHE40  | 8553     | basic helix-loop-helix family member e40                         |
| ENSG0000 | 4325.254 | -3.94389  | 0.277538 | -14.2103 | 7.91E-46  | 2.08E-42  | PER1     | 5187     | period circadian regulator 1                                     |
| ENSG0000 | 100532.5 | -2.10177  | 0.148745 | -14.13   | 2.48E-45  | 5.92E-42  | ND2      | 4536     | NADH dehydrogenase subunit 2                                     |
| ENSG0000 | 2633.898 | -3.08842  | 0.221583 | -13.938  | 3.72E-44  | 8.15E-41  | NA       | NA       | NA                                                               |
| ENSG0000 | 922.621  | -4.51819  | 0.324937 | -13.9048 | 5.92E-44  | 1.20E-40  | DAPK1    | 1612     | death associated protein kinase 1                                |
| ENSG0000 | 7550.216 | -2.63214  | 0.196139 | -13.4198 | 4.63E-41  | 8.69E-38  | MIDN     | 90007    | midnolin                                                         |
| ENSG0000 | 6378.852 | -4.49823  | 0.342968 | -13.1156 | 2.68E-39  | 4.14E-36  | HES1     | 3280     | hes family bHLH transcription factor 1                           |
| ENSG0000 | 1075.316 | -1.57721  | 0.125248 | -12.5927 | 2.32E-36  | 3.38E-33  | SELENOK  | 58515    | selenoprotein K                                                  |
| ENSG0000 | 146.2949 | 6.456761  | 0.517608 | 12.47423 | 1.03E-35  | 1.43E-32  | HOXD10   | 3236     | homeobox D10                                                     |
| ENSG0000 | 1061.686 | -6.19903  | 0.501918 | -12.3507 | 4.83E-35  | 6.34E-32  | C11orf96 | 387763   | chromosome 11 open reading frame 96                              |
| ENSG0000 | 1932.567 | 1.876146  | 0.153224 | 12.2445  | 1.80E-34  | 2.25E-31  | SH3KBP1  | 30011    | SH3 domain containing kinase binding protein 1                   |
| ENSG0000 | 8527.247 | -2.86766  | 0.235011 | -12.2023 | 3.02E-34  | 3.61E-31  | KLF10    | 7071     | KLF transcription factor 10                                      |
| ENSG0000 | 87.96214 | 5.844008  | 0.485298 | 12.0421  | 2.13E-33  | 2.44E-30  | GALNT18  | 374378   | polypeptide N-acetylgalactosaminyltransferase 18                 |
| ENSG0000 | 294.9143 | 6.777534  | 0.564817 | 11.99953 | 3.57E-33  | 3.91E-30  | VAT1L    | 57687    | vesicle amine transport 1 like                                   |
| ENSG0000 | 267.5419 | -4.25597  | 0.364698 | -11.6698 | 1.82E-31  | 1.84E-28  | LIMS3    | 96626    | LIM zinc finger domain containing 3                              |
| ENSG0000 | 259.4226 | -4.25694  | 0.370333 | -11.4949 | 1.40E-30  | 1.27E-27  | LIMS4    | 1E+08    | LIM zinc finger domain containing 4                              |
| ENSG0000 | 338.8982 | -6.79697  | 0.595277 | -11.4182 | 3.39E-30  | 2.97E-27  | NA       | NA       | NA                                                               |
| ENSG0000 | 65.65142 | 5.880763  | 0.515235 | 11.41375 | 3.57E-30  | 3.02E-27  | HOXD11   | 3237     | homeobox D11                                                     |
| ENSG0000 | 25511.49 | -1.91444  | 0.16782  | -11.4077 | 3.83E-30  | 3.14E-27  | ND4L     | 4539     | NADH dehydrogenase subunit 4L                                    |
| ENSG0000 | 3197.946 | 1.887737  | 0.165715 | 11.39146 | 4.61E-30  | 3.60E-27  | PTPN13   | 5783     | protein tyrosine phosphatase non-receptor type 13                |
| ENSG0000 | 46344.4  | -2.31991  | 0.203668 | -11.3906 | 4.66E-30  | 3.60E-27  | MTND2P2  | 1.01E+08 | MT-ND2 pseudogene 28                                             |
| ENSG0000 | 2541.964 | -2.41436  | 0.21518  | -11.2202 | 3.24E-29  | 2.43E-26  | MAFF     | 23764    | MAF bZIP transcription factor F                                  |
| ENSG0000 | 77.03513 | -3.62918  | 0.324131 | -11.1966 | 4.23E-29  | 3.09E-26  | NA       | NA       | NA                                                               |
| ENSG0000 | 1367.199 | -1.6113   | 0.146106 | -11.0283 | 2.79E-28  | 1.98E-25  | NA       | NA       | NA                                                               |
| ENSG0000 | 2186.721 | 1.999115  | 0.181924 | 10.98876 | 4.33E-28  | 2.99E-25  | ITPRID2  | 6744     | ITPR interacting domain containing 2                             |
| ENSG0000 | 100.425  | -3.69109  | 0.336626 | -10.965  | 5.63E-28  | 3.79E-25  | NA       | NA       | NA                                                               |
| ENSG0000 | 100.5881 | -3.78383  | 0.351766 | -10.7567 | 5.51E-27  | 3.53E-24  | NA       | NA       | NA                                                               |
| ENSG0000 | 2701.762 | -1.62242  | 0.151201 | -10.7303 | 7.34E-27  | 4.59E-24  | DDAH2    | 23564    | dimethylarginine dimethylaminohydrolase 2                        |
| ENSG0000 | 54.7552  | -4.75816  | 0.445771 | -10.674  | 1.35E-26  | 8.04E-24  | HOXC-AS2 | 1.01E+08 | HOXC cluster antisense RNA 2                                     |
| ENSG0000 | 228.1435 | 1.577099  | 0.148116 | 10.6477  | 1.79E-26  | 1.04E-23  | GSPT2    | 23708    | G1 to S phase transition 2                                       |
| ENSG0000 | 401.2329 | -4.4021   | 0.414703 | -10.6151 | 2.54E-26  | 1.45E-23  | EML6     | 400954   | EMAP like 6                                                      |
| ENSG0000 | 359.8155 | 6.078262  | 0.576909 | 10.53591 | 5.90E-26  | 3.30E-23  | HOXA13   | 3209     | homeobox A13                                                     |
| ENSG0000 | 1243.021 | 1.661063  | 0.157772 | 10.52824 | 6.40E-26  | 3.50E-23  | ZNF395   | 55893    | zinc finger protein 395                                          |
| ENSG0000 | 596.9496 | -1.77546  | 0.170853 | -10.3917 | 2.70E-25  | 1.45E-22  | ZNF408   | 79797    | zinc finger protein 408                                          |
| ENSG0000 | 3129.744 | -3.68871  | 0.360252 | -10.2393 | 1.32E-24  | 6.81E-22  | ZC3H12A  | 80149    | zinc finger CCCH-type containing 12A                             |
| ENSG0000 | 207.4425 | -10.9559  | 1.07403  | -10.2008 | 1.97E-24  | 9.93E-22  | LEP      | 3952     | leptin                                                           |
| ENSG0000 | 1474.826 | -5.21061  | 0.512295 | -10.1711 | 2.67E-24  | 1.29E-21  | ATF3     | 467      | activating transcription factor 3                                |
| ENSG0000 | 1048.174 | 1.671962  | 0.164402 | 10.16996 | 2.70E-24  | 1.29E-21  | PTGR3    | 284273   | prostaglandin reductase 3                                        |
| ENSG0000 | 99.36353 | -5.55874  | 0.555998 | -9.99778 | 1.56E-23  | 7.18E-21  | NA       | NA       | NA                                                               |
| ENSG0000 | 417.2829 | -5.58436  | 0.560241 | -9.96778 | 2.11E-23  | 9.55E-21  | USP2     | 9099     | ubiquitin specific peptidase 2                                   |
| ENSG0000 | 1508.093 | -4.75232  | 0.476899 | -9.96504 | 2.17E-23  | 9.65E-21  | LOC10272 | 1.03E+08 | salt inducible kinase 1B (putative)                              |
| ENSG0000 | 1365.287 | -4.70383  | 0.472509 | -9.955   | 2.40E-23  | 1.05E-20  | SIK1     | 150094   | salt inducible kinase 1                                          |
| ENSG0000 | 479.169  | -2.09912  | 0.211791 | -9.9113  | 3.72E-23  | 1.57E-20  | TUFT1    | 7286     | tuftelin 1                                                       |
| ENSG0000 | 477.1729 | -1.89239  | 0.190956 | -9.91008 | 3.76E-23  | 1.57E-20  | H1-2     | 3006     | H1.2 linker histone, cluster member                              |
| ENSG0000 | 7047.515 | 2.231672  | 0.226451 | 9.854998 | 6.52E-23  | 2.68E-20  | CD109    | 135228   | CD109 molecule                                                   |
| ENSG0000 | 358.6499 | -8.43033  | 0.855739 | -9.85152 | 6.75E-23  | 2.73E-20  | MYH1     | 4619     | myosin heavy chain 1                                             |
| ENSG0000 | 748.7    | 1.769018  | 0.179617 | 9.848814 | 6.94E-23  | 2.76E-20  | PPARA    | 5465     | peroxisome proliferator activated receptor alpha                 |
| ENSG0000 | 1275.773 | -3.14592  | 0.323036 | -9.73861 | 2.06E-22  | 8.09E-20  | MAP3K8   | 1326     | mitogen-activated protein kinase kinase kinase 8                 |
| ENSG0000 | 191.8913 | 1.728914  | 0.177595 | 9.735126 | 2.14E-22  | 8.25E-20  | PDP2     | 57546    | pyruvate dehydrogenase phosphatase catalytic subunit 2           |
| ENSG0000 | 1519.447 | -2.31635  | 0.238009 | -9.73221 | 2.20E-22  | 8.32E-20  | GDPD5    | 81544    | glycerophosphodiester phosphodiesterase domain contain           |
| ENSG0000 | 1337.994 | -1.98349  | 0.203827 | -9.73124 | 2.22E-22  | 8.32E-20  | NA       | NA       | NA                                                               |
| ENSG0000 | 43192.03 | -1.55111  | 0.159554 | -9.72153 | 2.44E-22  | 9.03E-20  | MTATP6P  | 1.06E+08 | MT-ATP6 pseudogene 1                                             |
| ENSG0000 | 116.8718 | -10.1288  | 1.047503 | -9.66944 | 4.07E-22  | 1.46E-19  | HOXB8    | 3218     | homeobox B8                                                      |
| ENSG0000 | 113.7697 | -3.48485  | 0.360472 | -9.66745 | 4.15E-22  | 1.47E-19  | NA       | NA       | NA                                                               |
| ENSG0000 | 102.3169 | -3.53384  | 0.367122 | -9.62578 | 6.22E-22  | 2.18E-19  | NA       | NA       | NA                                                               |
| ENSG0000 | 225837.6 | -1.70149  | 0.17703  | -9.61128 | 7.17E-22  | 2.48E-19  | ND4      | 4538     | NADH dehydrogenase subunit 4                                     |
| ENSG0000 | 996.5017 | -6.06082  | 0.63105  | -9.60435 | 7.66E-22  | 2.61E-19  | PCSK9    | 255738   | proprotein convertase subtilisin/kexin type 9                    |
| ENSG0000 | 128355.5 | -2.14083  | 0.223384 | -9.58363 | 9.37E-22  | 3.16E-19  | CYTB     | 4519     | cytochrome b                                                     |
| ENSG0000 | 129.3665 | -6.12554  | 0.641381 | -9.55055 | 1.29E-21  | 4.18E-19  | EXPH5    | 23086    | exophilin 5                                                      |
| ENSG0000 | 2154.908 | -2.73588  | 0.287122 | -9.52863 | 1.59E-21  | 5.10E-19  | LIMS2    | 55679    | LIM zinc finger domain containing 2                              |
| ENSG0000 | 105.8647 | -2.09924  | 0.220839 | -9.50576 | 1.99E-21  | 6.21E-19  | MMP15    | 4324     | matrix metalloproteinase 15                                      |
| ENSG0000 | 153.4485 | -1.52603  | 0.16151  | -9.44853 | 3.44E-21  | 1.06E-18  | NA       | NA       | NA                                                               |
| ENSG0000 | 370.6283 | -2.76478  | 0.294297 | -9.39452 | 5.75E-21  | 1.71E-18  | HSD17B14 | 51171    | hydroxysteroid 17-beta dehydrogenase 14                          |
| ENSG0000 | 154.0538 | -4.64282  | 0.494246 | -9.39375 | 5.79E-21  | 1.71E-18  | TRPC6    | 7225     | transient receptor potential cation channel subfamily C member 6 |
| ENSG0000 | 224.9752 | 1.696886  | 0.180719 | 9.389633 | 6.02E-21  | 1.76E-18  | KBTBD6   | 89890    | kelch repeat and BTB domain containing 6                         |
| ENSG0000 | 614.5936 | -3.3338   | 0.355213 | -9.38534 | 6.27E-21  | 1.81E-18  | KIT      | 3815     | KIT proto-oncogene, receptor tyrosine kinase                     |
| ENSG0000 | 961.1958 | 3.658463  | 0.391816 | 9.337192 | 9.89E-21  | 2.82E-18  | MATN2    | 4147     | matrilin 2                                                       |
| ENSG0000 | 700.6564 | -2.09847  | 0.226111 | -9.28068 | 1.68E-20  | 4.76E-18  | DHRS7B   | 25979    | dehydrogenase/reductase 7B                                       |
| ENSG0000 | 1429.274 | 3.513165  | 0.380688 | 9.228468 | 2.75E-20  | 7.37E-18  | CA12     | 771      | carbonic anhydrase 12                                            |
| ENSG0000 | 33.91774 | -3.41513  | 0.370711 | -9.21239 | 3.19E-20  | 8.38E-18  | BHLHE40  | 1.01E+08 | BHLHE40 antisense RNA 1                                          |
| ENSG0000 | 938.5063 | 2.653177  | 0.288591 | 9.193552 | 3.80E-20  | 9.88E-18  | EHD3     | 30845    | EH domain containing 3                                           |
| ENSG0000 | 196.1425 | -1.7539   | 0.1914   | -9.16352 | 5.02E-20  | 1.27E-17  | C15orf61 | 145853   | chromosome 15 open reading frame 61                              |
| ENSG0000 | 263.4157 | -9.85328  | 1.080103 | -9.12253 | 7.34E-20  | 1.82E-17  | HOXB-AS3 | 404266   | HOXB cluster antisense RNA 3                                     |
| ENSG0000 | 4006.734 | -3.2481   | 0.3561   | -9.12132 | 7.42E-20  | 1.82E-17  | PIM1     | 5292     | Pim-1 proto-oncogene, serine/threonine kinase                    |
| ENSG0000 | 59.53254 | 3.202532  | 0.35161  | 9.108189 | 8.38E-20  | 2.04E-17  | SOX8     | 30812    | SRY-box transcription factor 8                                   |



|          |          |          |          |          |          |          |          |          |                                                               |
|----------|----------|----------|----------|----------|----------|----------|----------|----------|---------------------------------------------------------------|
| ENSG0000 | 588.4189 | -3.39005 | 0.447058 | -7.58301 | 3.38E-14 | 3.48E-12 | CHRD     | 8646     | chordin                                                       |
| ENSG0000 | 27.64859 | -3.73939 | 0.493264 | -7.5809  | 3.43E-14 | 3.51E-12 | CCDC148  | 130940   | coiled-coil domain containing 148                             |
| ENSG0000 | 31.65399 | -5.19311 | 0.686068 | -7.56938 | 3.75E-14 | 3.79E-12 | LOC10537 | 1.05E+08 | uncharacterized LOC105370047                                  |
| ENSG0000 | 105.4978 | -2.23587 | 0.295906 | -7.55602 | 4.16E-14 | 4.17E-12 | DHRS12   | 79758    | dehydrogenase/reductase 12                                    |
| ENSG0000 | 17.9985  | 4.493609 | 0.594778 | 7.555102 | 4.19E-14 | 4.18E-12 | NA       | NA       | NA                                                            |
| ENSG0000 | 199.0755 | 3.25139  | 0.430651 | 7.549936 | 4.35E-14 | 4.33E-12 | PRKAR2B  | 5577     | protein kinase cAMP-dependent type II regulatory subunit beta |
| ENSG0000 | 1495.317 | -3.01048 | 0.3997   | -7.53185 | 5.00E-14 | 4.92E-12 | RNA5-8SN | 1.1E+08  | RNA, 5.8S ribosomal N3                                        |
| ENSG0000 | 1494.572 | -3.0097  | 0.399921 | -7.52575 | 5.24E-14 | 5.12E-12 | RNA5-8SN | 1.1E+08  | RNA, 5.8S ribosomal N2                                        |
| ENSG0000 | 1493.937 | -3.01154 | 0.40078  | -7.51419 | 5.73E-14 | 5.55E-12 | RNA5-8SN | 1.07E+08 | RNA, 5.8S ribosomal N1                                        |
| ENSG0000 | 1493.192 | -3.01076 | 0.401001 | -7.50812 | 6.00E-14 | 5.75E-12 | LOC12490 | 1.25E+08 | 5.8S ribosomal RNA                                            |
| ENSG0000 | 1493.192 | -3.01076 | 0.401001 | -7.50812 | 6.00E-14 | 5.75E-12 | LOC12490 | 1.25E+08 | 5.8S ribosomal RNA                                            |
| ENSG0000 | 1493.192 | -3.01076 | 0.401001 | -7.50812 | 6.00E-14 | 5.75E-12 | RNA5-8SP | 1.1E+08  | RNA, 5.8S ribosomal pseudogene 10                             |
| ENSG0000 | 1492.862 | -3.01042 | 0.401074 | -7.5059  | 6.10E-14 | 5.81E-12 | RNA5-8SN | 1E+08    | RNA, 5.8S ribosomal N5                                        |
| ENSG0000 | 1492.862 | -3.01042 | 0.401074 | -7.5059  | 6.10E-14 | 5.81E-12 | RNA5-8SN | 1.1E+08  | RNA, 5.8S ribosomal N4                                        |
| ENSG0000 | 108.7304 | 6.770845 | 0.90346  | 7.49435  | 6.66E-14 | 6.32E-12 | MYPN     | 84665    | myopalladin                                                   |
| ENSG0000 | 82.71256 | 2.091138 | 0.279763 | 7.474688 | 7.74E-14 | 7.29E-12 | FAR2     | 55711    | fatty acyl-CoA reductase 2                                    |
| ENSG0000 | 93.24905 | 8.831182 | 1.181701 | 7.473282 | 7.82E-14 | 7.31E-12 | PPP2R2B  | 5521     | protein phosphatase 2 regulatory subunit Bbeta                |
| ENSG0000 | 17596.63 | -2.96255 | 0.396503 | -7.4717  | 7.92E-14 | 7.37E-12 | HMOX1    | 3162     | heme oxygenase 1                                              |
| ENSG0000 | 1743.851 | -2.68902 | 0.360086 | -7.4677  | 8.16E-14 | 7.57E-12 | CLCF1    | 23529    | cardiotrophin like cytokine factor 1                          |
| ENSG0000 | 1963.6   | -2.23115 | 0.299032 | -7.46126 | 8.57E-14 | 7.93E-12 | ARL5B    | 221079   | ADP ribosylation factor like GTPase 5B                        |
| ENSG0000 | 11162.55 | -2.01725 | 0.270889 | -7.44675 | 9.57E-14 | 8.75E-12 | MTND1P2  | 1.01E+08 | MT-ND1 pseudogene 23                                          |
| ENSG0000 | 281.4301 | -5.4297  | 0.72929  | -7.44519 | 9.68E-14 | 8.83E-12 | FGF18    | 8817     | fibroblast growth factor 18                                   |
| ENSG0000 | 76.74286 | -2.38917 | 0.322077 | -7.41801 | 1.19E-13 | 1.07E-11 | NA       | NA       | NA                                                            |
| ENSG0000 | 106.8736 | 2.307133 | 0.3113   | 7.411292 | 1.25E-13 | 1.11E-11 | MIR381HG | 378881   | MIR381 host gene                                              |
| ENSG0000 | 88.49612 | -3.66841 | 0.495851 | -7.39821 | 1.38E-13 | 1.20E-11 | SEMA6A   | 57556    | semaphorin 6A                                                 |
| ENSG0000 | 432.9565 | 5.538879 | 0.748917 | 7.395855 | 1.41E-13 | 1.22E-11 | TENT5C   | 54855    | terminal nucleotidyltransferase 5C                            |
| ENSG0000 | 43.10068 | -5.41779 | 0.732917 | -7.39209 | 1.45E-13 | 1.25E-11 | ITIH3    | 3699     | inter-alpha-trypsin inhibitor heavy chain 3                   |
| ENSG0000 | 44.57541 | 4.218908 | 0.57102  | 7.388368 | 1.49E-13 | 1.28E-11 | FRMD3    | 257019   | FERM domain containing 3                                      |
| ENSG0000 | 119.4693 | 2.360905 | 0.32096  | 7.355759 | 1.90E-13 | 1.60E-11 | PM20D2   | 135293   | peptidase M20 domain containing 2                             |
| ENSG0000 | 237.2115 | 6.913377 | 0.941472 | 7.343157 | 2.09E-13 | 1.74E-11 | SLC14A1  | 6563     | solute carrier family 14 member 1 (Kidd blood group)          |
| ENSG0000 | 637.1536 | -4.08734 | 0.557733 | -7.32849 | 2.33E-13 | 1.94E-11 | IGSF10   | 285313   | immunoglobulin superfamily member 10                          |
| ENSG0000 | 356.587  | 3.574173 | 0.48779  | 7.327279 | 2.35E-13 | 1.95E-11 | UBASH3B  | 84959    | ubiquitin associated and SH3 domain containing B              |
| ENSG0000 | 153.282  | 4.630197 | 0.633003 | 7.314657 | 2.58E-13 | 2.13E-11 | CDK15    | 65061    | cyclin dependent kinase 15                                    |
| ENSG0000 | 2548.446 | 5.372185 | 0.735852 | 7.300637 | 2.86E-13 | 2.35E-11 | ENPP1    | 5167     | ectonucleotide pyrophosphatase/phosphodiesterase 1            |
| ENSG0000 | 26.50738 | 3.740349 | 0.512564 | 7.297333 | 2.94E-13 | 2.40E-11 | LTK      | 4058     | leukocyte receptor tyrosine kinase                            |







|          |          |          |          |          |          |          |           |           |                                                        |
|----------|----------|----------|----------|----------|----------|----------|-----------|-----------|--------------------------------------------------------|
| ENSG0000 | 124.9972 | -3.34374 | 0.407745 | -8.20057 | 2.39E-16 | 2.35E-14 | LINC02615 | 100507487 | long intergenic non-protein coding RNA 2615            |
| ENSG0000 | 421.3938 | 3.333808 | 0.407002 | 8.191126 | 2.59E-16 | 2.53E-14 | INSYN2B   | 100131897 | inhibitory synaptic factor family member 2B            |
| ENSG0000 | 381.777  | -2.35735 | 0.287854 | -8.1894  | 2.63E-16 | 2.54E-14 | NA        | NA        | NA                                                     |
| ENSG0000 | 2536.062 | 1.532345 | 0.18739  | 8.177315 | 2.90E-16 | 2.79E-14 | GOLGA4    | 2803      | golgin A4                                              |
| ENSG0000 | 497.931  | 3.091634 | 0.378095 | 8.176873 | 2.91E-16 | 2.79E-14 | ZNF770    | 54989     | zinc finger protein 770                                |
| ENSG0000 | 828.6896 | 2.52389  | 0.308733 | 8.174982 | 2.96E-16 | 2.82E-14 | NA        | NA        | NA                                                     |
| ENSG0000 | 1617.83  | 1.525879 | 0.18791  | 8.12025  | 4.65E-16 | 4.34E-14 | CNOT1     | 23019     | CCR4-NOT transcription complex subunit 1               |
| ENSG0000 | 1525.242 | 1.644605 | 0.202942 | 8.103828 | 5.33E-16 | 4.89E-14 | AKAP11    | 11215     | A-kinase anchoring protein 11                          |
| ENSG0000 | 99197.88 | -1.82957 | 0.226103 | -8.09173 | 5.88E-16 | 5.36E-14 | NA        | NA        | NA                                                     |
| ENSG0000 | 532.0844 | 1.591591 | 0.197    | 8.079134 | 6.52E-16 | 5.88E-14 | RPS27AP1  | 643358    | RPS27A pseudogene 16                                   |
| ENSG0000 | 89.34327 | 1.888525 | 0.234423 | 8.056071 | 7.88E-16 | 7.03E-14 | HNRNPKP   | 644063    | heterogeneous nuclear ribonucleoprotein K pseudogene 4 |
| ENSG0000 | 560.0926 | 1.956532 | 0.243745 | 8.026951 | 9.99E-16 | 8.82E-14 | PI4K2B    | 55300     | phosphatidylinositol 4-kinase type 2 beta              |
| ENSG0000 | 187.0027 | -1.92135 | 0.239451 | -8.02395 | 1.02E-15 | 8.94E-14 | NA        | NA        | NA                                                     |
| ENSG0000 | 2001.595 | -1.85116 | 0.230705 | -8.02392 | 1.02E-15 | 8.94E-14 | NA        | NA        | NA                                                     |
| ENSG0000 | 104.4869 | 1.531246 | 0.190857 | 8.023003 | 1.03E-15 | 8.98E-14 | SUV39H2   | 79723     | SUV39H2 histone lysine methyltransferase               |
| ENSG0000 | 75.55588 | 2.495096 | 0.31282  | 7.976136 | 1.51E-15 | 1.30E-13 | NA        | NA        | NA                                                     |
| ENSG0000 | 253.2461 | -2.16813 | 0.273112 | -7.9386  | 2.04E-15 | 1.72E-13 | NA        | NA        | NA                                                     |
| ENSG0000 | 866.6064 | 1.778529 | 0.224117 | 7.935728 | 2.09E-15 | 1.75E-13 | ZFH3      | 463       | zinc finger homeobox 3                                 |
| ENSG0000 | 555.7485 | -2.35685 | 0.297219 | -7.92966 | 2.20E-15 | 1.82E-13 | SLC4A3    | 6508      | solute carrier family 4 member 3                       |
| ENSG0000 | 755.0404 | 1.601232 | 0.201945 | 7.929066 | 2.21E-15 | 1.82E-13 | DENND4C   | 55667     | DENN domain containing 4C                              |
| ENSG0000 | 643.3359 | -1.821   | 0.229702 | -7.92767 | 2.23E-15 | 1.84E-13 | PSENE1    | 55851     | presenilin enhancer, gamma-secretase subunit           |
| ENSG0000 | 2501.932 | -1.64545 | 0.207642 | -7.92446 | 2.29E-15 | 1.88E-13 | NRBP2     | 340371    | nuclear receptor binding protein 2                     |
| ENSG0000 | 143.4934 | -5.46472 | 0.690601 | -7.91299 | 2.51E-15 | 2.05E-13 | HOXB5     | 3215      | homeobox B5                                            |
| ENSG0000 | 186.7282 | -1.58467 | 0.200473 | -7.90462 | 2.69E-15 | 2.18E-13 | AAMDC     | 28971     | adipogenesis associated Mth938 domain containing       |
| ENSG0000 | 675.9294 | 1.76748  | 0.223678 | 7.90188  | 2.75E-15 | 2.22E-13 | TRAF3     | 7187      | TNF receptor associated factor 3                       |
| ENSG0000 | 14030.62 | -2.77823 | 0.352791 | -7.87499 | 3.41E-15 | 2.73E-13 | DUSP1     | 1843      | dual specificity phosphatase 1                         |
| ENSG0000 | 630.0246 | 1.903581 | 0.242192 | 7.859814 | 3.85E-15 | 3.07E-13 | PPARA     | 5465      | peroxisome proliferator activated receptor alpha       |



|          |          |          |          |          |          |          |         |        |                                                |
|----------|----------|----------|----------|----------|----------|----------|---------|--------|------------------------------------------------|
| ENSG0000 | 89.78745 | -2.88757 | 0.6912   | -4.17762 | 2.95E-05 | 0.006679 | CEND1   | 51286  | cell cycle exit and neuronal differentiation 1 |
| ENSG0000 | 2084.587 | -2.00358 | 0.480117 | -4.17311 | 3.00E-05 | 0.006734 | EMILIN2 | 84034  | elastin microfibril interfacier 2              |
| ENSG0000 | 163.4372 | -5.16716 | 1.242363 | -4.15914 | 3.19E-05 | 0.007077 | PPP2R2B | 5521   | protein phosphatase 2 regulatory subunit Bbeta |
| ENSG0000 | 1187.545 | -1.81148 | 0.436227 | -4.1526  | 3.29E-05 | 0.0072   | WASH5P  | 375690 | WASP family homolog 5, pseudogene              |
| ENSG0000 | 17.21602 | 4.214509 | 1.018348 | 4.138575 | 3.49E-05 | 0.007484 | CXCL5   | 6374   | C-X-C motif chemokine ligand 5                 |
| ENSG0000 | 225.3796 | 3.253603 | 0.788817 | 4.124661 | 3.71E-05 | 0.007864 | PARP8   | 79668  | poly(ADP-ribose) polymerase family member 8    |
| ENSG0000 | 520.2897 | 3.814356 | 0.931728 | 4.09385  | 4.24E-05 | 0.008888 | TNFSF4  | 7292   | TNF superfamily member 4                       |
| ENSG0000 | 2589.674 | 5.167372 | 1.264417 | 4.086764 | 4.37E-05 | 0.009066 | OAS2    | 4939   | 2'-5'-oligoadenylate synthetase 2              |
| ENSG0000 | 353.717  | 2.250372 | 0.551911 | 4.077416 | 4.55E-05 | 0.009337 | SLC38A4 | 55089  | solute carrier family 38 member 4              |
| ENSG0000 | 57.97265 | -2.20493 | 0.542931 | -4.06116 | 4.88E-05 | 0.009907 | CTSH    | 1512   | cathepsin H                                    |





|          |          |          |          |          |          |          |          |        |                                                               |
|----------|----------|----------|----------|----------|----------|----------|----------|--------|---------------------------------------------------------------|
| ENSG0000 | 3183.818 | 2.108196 | 0.405083 | 5.204352 | 1.95E-07 | 1.94E-05 | SSC5D    | 284297 | scavenger receptor cysteine rich family member with 5 domains |
| ENSG0000 | 1053.543 | -2.35148 | 0.452447 | -5.19725 | 2.02E-07 | 2.00E-05 | FBXO32   | 114907 | F-box protein 32                                              |
| ENSG0000 | 33.4723  | -7.73193 | 1.490568 | -5.18724 | 2.13E-07 | 2.10E-05 | MUC13    | 56667  | mucin 13, cell surface associated                             |
| ENSG0000 | 96.03064 | -4.78508 | 0.923046 | -5.18401 | 2.17E-07 | 2.13E-05 | PTPN22   | 26191  | protein tyrosine phosphatase non-receptor type 22             |
| ENSG0000 | 881.8898 | -5.89147 | 1.137604 | -5.17884 | 2.23E-07 | 2.18E-05 | IFI44L   | 10964  | interferon induced protein 44 like                            |
| ENSG0000 | 355.5621 | 3.663582 | 0.708403 | 5.171607 | 2.32E-07 | 2.25E-05 | NA       | NA     | NA                                                            |
| ENSG0000 | 2757.135 | 3.878189 | 0.751944 | 5.157548 | 2.50E-07 | 2.40E-05 | PODN     | 127435 | podocan                                                       |
| ENSG0000 | 2349.456 | -5.95561 | 1.15476  | -5.15745 | 2.50E-07 | 2.40E-05 | CXCL6    | 6372   | C-X-C motif chemokine ligand 6                                |
| ENSG0000 | 165.5569 | 2.775147 | 0.538247 | 5.1559   | 2.52E-07 | 2.41E-05 | LOC72839 | 728392 | uncharacterized LOC728392                                     |
| ENSG0000 | 84.18152 | -5.50176 | 1.067488 | -5.15394 | 2.55E-07 | 2.43E-05 | NA       | NA     | NA                                                            |
| ENSG0000 | 108.4969 | -7.38842 | 1.43502  | -5.14865 | 2.62E-07 | 2.48E-05 | CCL5     | 6352   | C-C motif chemokine ligand 5                                  |
| ENSG0000 | 2037.784 | 1.927662 | 0.374452 | 5.147958 | 2.63E-07 | 2.48E-05 | TSHZ1    | 10194  | teashirt zinc finger homeobox 1                               |
| ENSG0000 | 207.9726 | -4.54869 | 0.884094 | -5.14503 | 2.67E-07 | 2.51E-05 | ISG20    | 3669   | interferon stimulated exonuclease gene 20                     |







|          |          |          |          |          |          |          |          |                                                           |
|----------|----------|----------|----------|----------|----------|----------|----------|-----------------------------------------------------------|
| ENSG0000 | 1021.71  | -5.41592 | 0.704335 | -7.68941 | 1.48E-14 | 1.36E-12 | FABP3    | 2170 fatty acid binding protein 3                         |
| ENSG0000 | 2512.268 | 5.031316 | 0.656509 | 7.663744 | 1.81E-14 | 1.62E-12 | ENPP1    | 5167 ectonucleotide pyrophosphatase/phosphodiesterase 1   |
| ENSG0000 | 175.1274 | 2.328193 | 0.303895 | 7.661165 | 1.84E-14 | 1.65E-12 | MBNL3    | 55796 muscleblind like splicing regulator 3               |
| ENSG0000 | 196797.3 | -1.985   | 0.259341 | -7.65402 | 1.95E-14 | 1.73E-12 | ND4      | 4538 NADH dehydrogenase subunit 4                         |
| ENSG0000 | 46.81836 | -1.64439 | 0.21501  | -7.64795 | 2.04E-14 | 1.80E-12 | ATP6AP1- | 158960 ATP6AP1 divergent transcript                       |
| ENSG0000 | 75.6988  | -4.76642 | 0.62364  | -7.6429  | 2.12E-14 | 1.85E-12 | TMEM88   | 92162 transmembrane protein 88                            |
| ENSG0000 | 517.4082 | 2.660464 | 0.348417 | 7.635868 | 2.24E-14 | 1.94E-12 | THSD4    | 79875 thrombospondin type 1 domain containing 4           |
| ENSG0000 | 57.43588 | 4.468204 | 0.585473 | 7.63179  | 2.32E-14 | 1.99E-12 | NA       | NA                                                        |
| ENSG0000 | 45.33787 | -4.60448 | 0.603406 | -7.63081 | 2.33E-14 | 2.00E-12 | NA       | NA                                                        |
| ENSG0000 | 69.98122 | -2.33145 | 0.305848 | -7.62292 | 2.48E-14 | 2.12E-12 | NA       | NA                                                        |
| ENSG0000 | 42.17259 | -1.79207 | 0.236563 | -7.57543 | 3.58E-14 | 3.01E-12 | NA       | NA                                                        |
| ENSG0000 | 40.06613 | 2.333696 | 0.308159 | 7.573023 | 3.65E-14 | 3.06E-12 | MAP10    | 54627 microtubule associated protein 10                   |
| ENSG0000 | 32.12284 | -2.69676 | 0.356154 | -7.57188 | 3.68E-14 | 3.07E-12 | NA       | NA                                                        |
| ENSG0000 | 49.14957 | 9.01836  | 1.191069 | 7.571654 | 3.69E-14 | 3.07E-12 | NA       | NA                                                        |
| ENSG0000 | 95.99523 | 8.543133 | 1.130256 | 7.558583 | 4.07E-14 | 3.38E-12 | SHOX     | 6473 short stature homeobox                               |
| ENSG0000 | 235.5587 | 2.447341 | 0.324015 | 7.553168 | 4.25E-14 | 3.50E-12 | CNIH3    | 149111 cornichon family AMPA receptor auxiliary protein 3 |
| ENSG0000 | 53.93909 | -7.80817 | 1.034709 | -7.54625 | 4.48E-14 | 3.66E-12 | NPNT     | 255743 nephronectin                                       |
| ENSG0000 | 6411.784 | -2.23815 | 0.29661  | -7.54576 | 4.50E-14 | 3.66E-12 | CCNL1    | 57018 cyclin L1                                           |
| ENSG0000 | 23.86668 | -3.47719 | 0.461035 | -7.54213 | 4.62E-14 | 3.74E-12 | FLJ12825 | 440101 uncharacterized LOC440101                          |
| ENSG0000 | 20.54272 | -4.22768 | 0.560646 | -7.54073 | 4.67E-14 | 3.76E-12 | NA       | NA                                                        |
| ENSG0000 | 376.4658 | -1.6855  | 0.22357  | -7.53905 | 4.73E-14 | 3.79E-12 | INTS6L   | 203522 integrator complex subunit 6 like                  |
| ENSG0000 | 70.35851 | 1.763044 | 0.234265 | 7.525847 | 5.24E-14 | 4.17E-12 | NA       | NA                                                        |
| ENSG0000 | 417249   | -1.95067 | 0.259456 | -7.51831 | 5.55E-14 | 4.37E-12 | COX1     | 4512 cytochrome c oxidase subunit I                       |
| ENSG0000 | 261.196  | 1.708592 | 0.227848 | 7.498828 | 6.44E-14 | 5.05E-12 | ZBTB6    | 10773 zinc finger and BTB domain containing 6             |
| ENSG0000 | 46.21098 | 1.947751 | 0.260064 | 7.489517 | 6.91E-14 | 5.39E-12 | NA       | NA                                                        |
| ENSG0000 | 2768.068 | -3.19402 | 0.42661  | -7.48697 | 7.05E-14 | 5.48E-12 | ZC3H12A  | 80149 zinc finger CCCH-type containing 12A                |
| ENSG0000 | 23.09838 | -3.31275 | 0.442513 | -7.48622 | 7.09E-14 | 5.48E-12 | SLC52A1  | 55065 solute carrier family 52 member 1                   |
| ENSG0000 | 670.1142 | -2.74418 | 0.366604 | -7.48541 | 7.13E-14 | 5.50E-12 | RASD1    | 51655 ras related dexamethasone induced 1                 |
| ENSG0000 | 160.75   | 1.798934 | 0.241361 | 7.453289 | 9.10E-14 | 6.84E-12 | NA       | NA                                                        |
| ENSG0000 | 1137.111 | 1.777016 | 0.23851  | 7.450502 | 9.30E-14 | 6.97E-12 | SYT11    | 23208 synaptotagmin 11                                    |
| ENSG0000 | 454.2461 | -2.23233 | 0.299989 | -7.44136 | 9.97E-14 | 7.45E-12 | SLC19A2  | 10560 solute carrier family 19 member 2                   |
| ENSG0000 | 575.7942 | 2.457668 | 0.331007 | 7.424833 | 1.13E-13 | 8.37E-12 | ZNF770   | 54989 zinc finger protein 770                             |
| ENSG0000 | 1346.564 | 2.552883 | 0.343988 | 7.421423 | 1.16E-13 | 8.54E-12 | ZNF281   | 23528 zinc finger protein 281                             |
| ENSG0000 | 572.4333 | 10.36745 | 1.397806 | 7.416948 | 1.20E-13 | 8.81E-12 | USP9Y    | 8287 ubiquitin specific peptidase 9 Y-linked              |

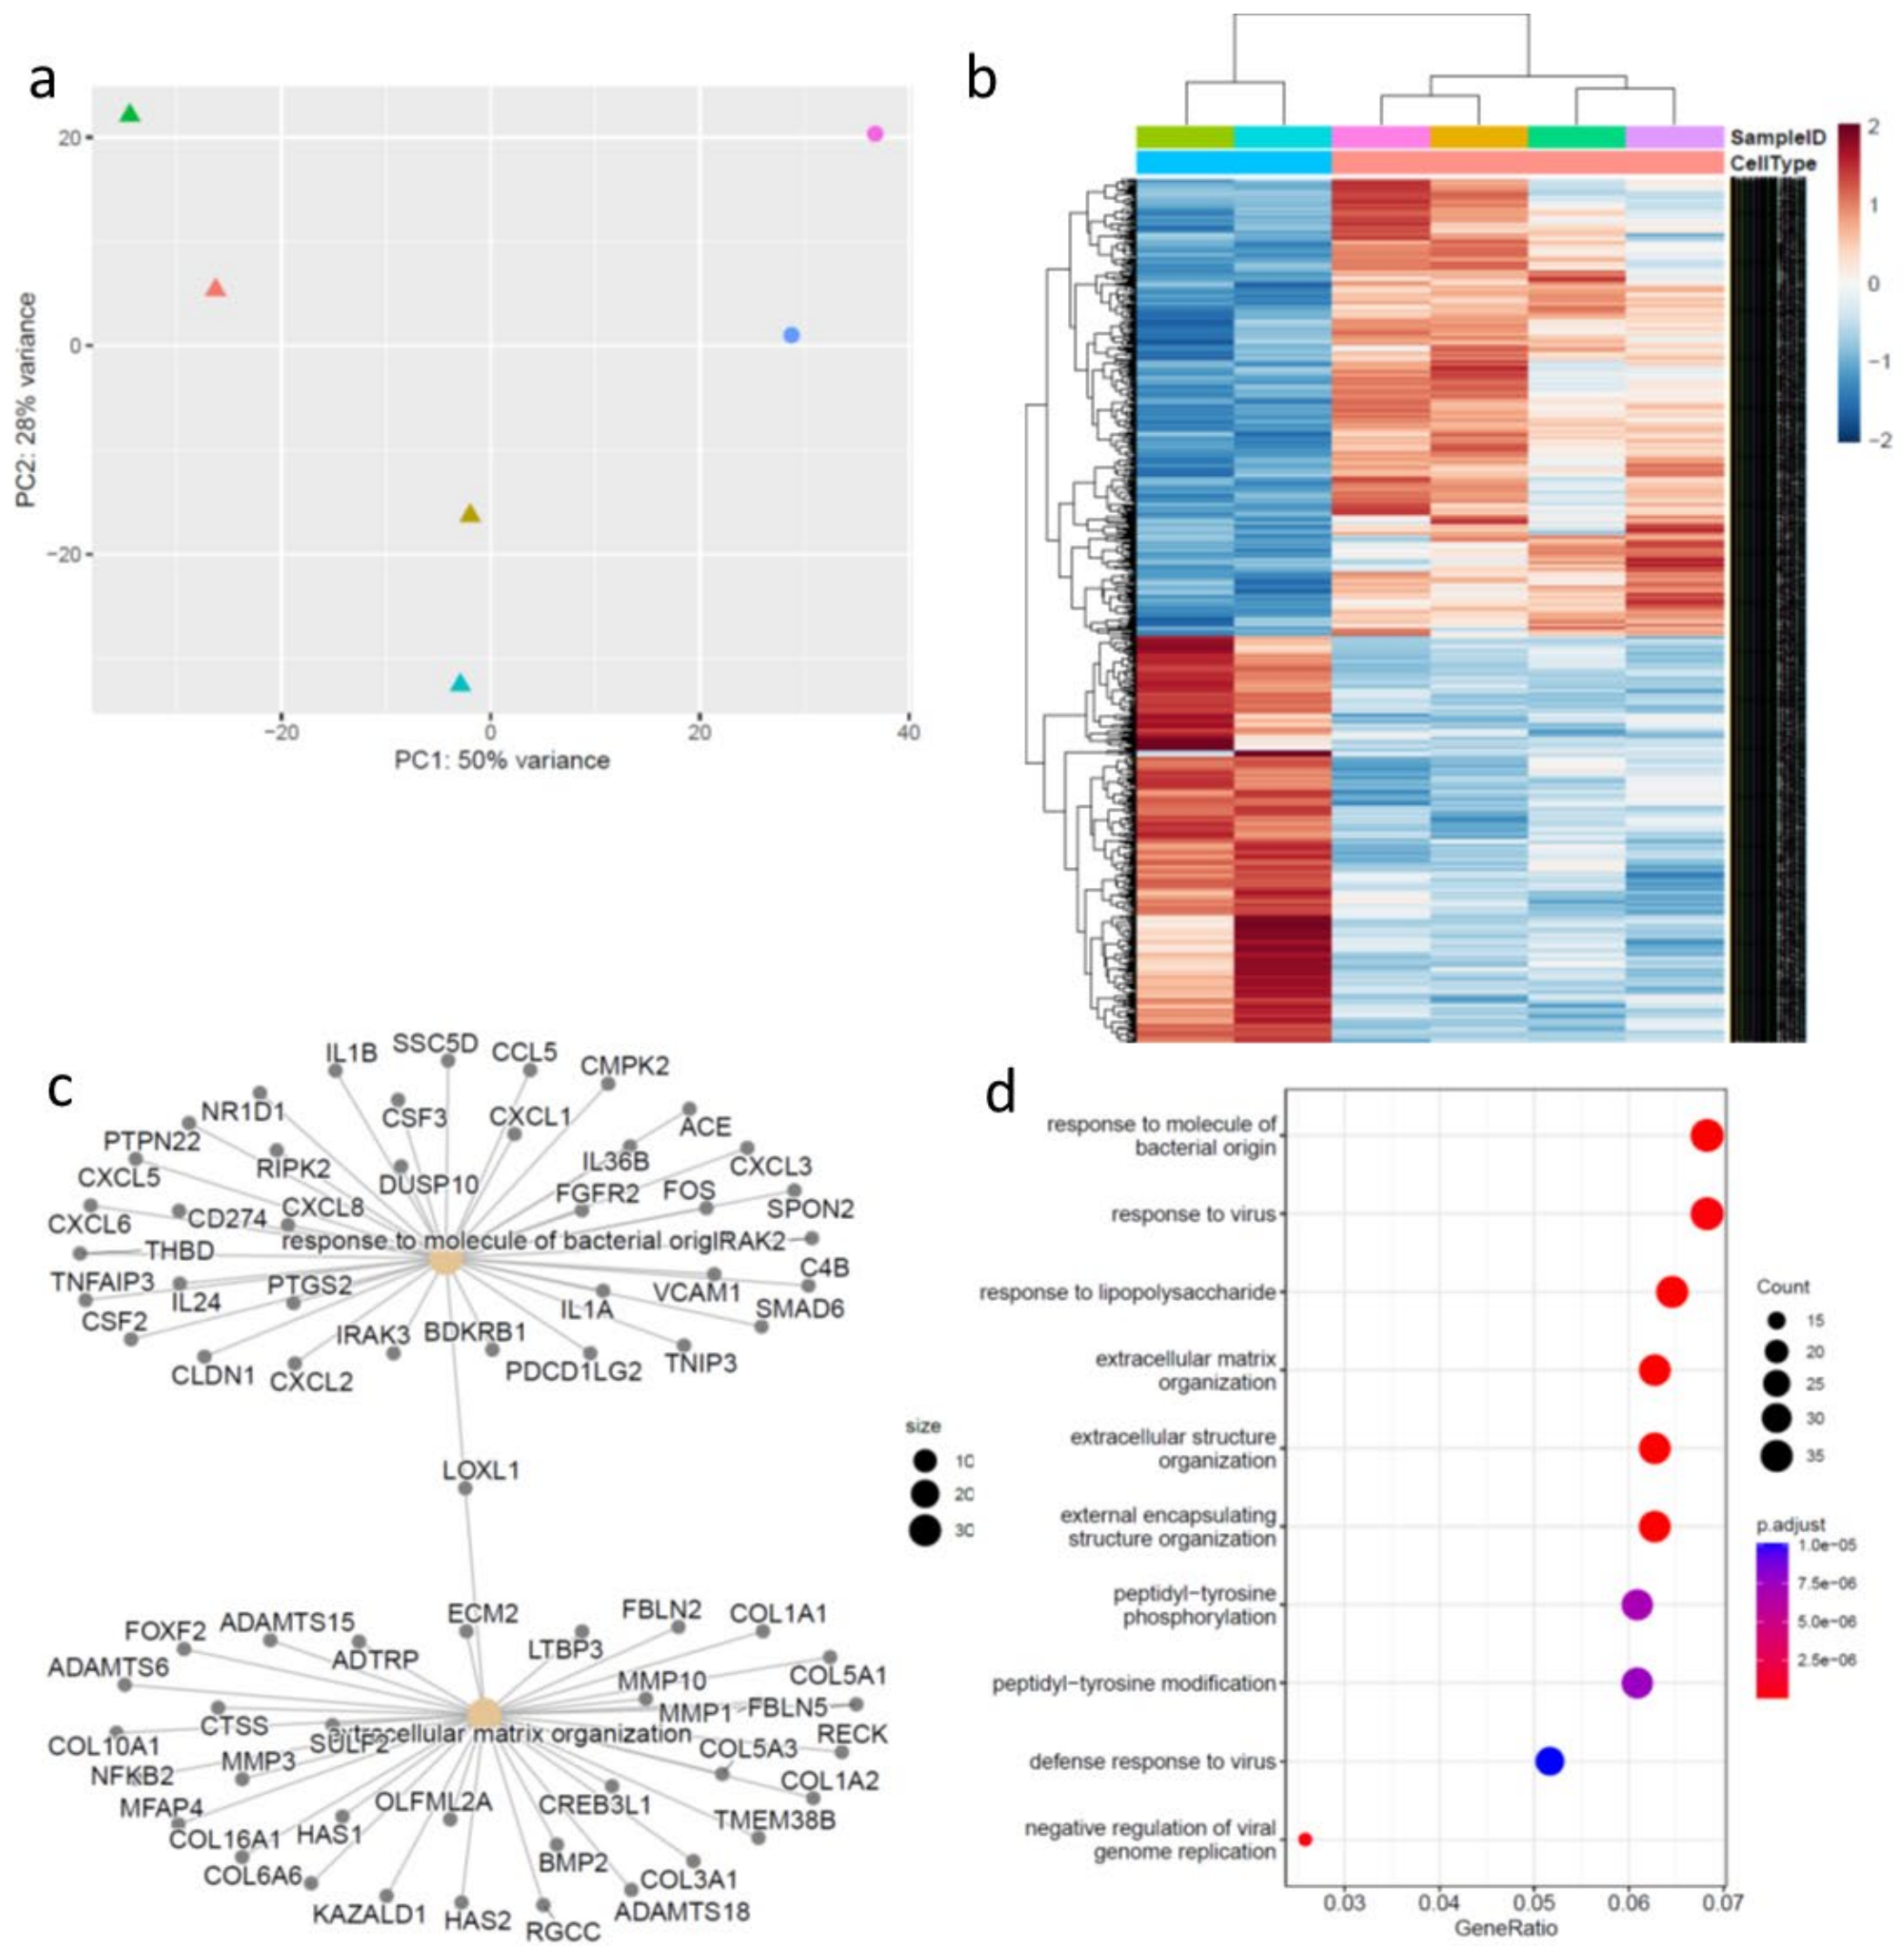

*Supp Figure 1. Differentially expressed genes identified in Dupuytren disease cord fibroblasts compared to WNT4scrambledsiRNA. (A) PCA analysis of the DDC fibroblasts and ScramsiRNA (triangle is DDC, circle is ScramsiRNA). (B) Heatmap showing clustering of significantly differentially expressed genes in DDC (cream) vs ScramsiRNA (blue) fibroblasts. (C) Concept network plot representing the expression of genes from functional categories associated with extracellular matrix. The selected genes were identified based on GO analysis. (D) GO analysis identified over-representative GO terms for the DEGs in treated fibroblasts. The top 10 significantly enriched GO terms in the biological pathway are shown and include extracellular matrix and structure and organization.*
